# Supplementary material
Source: publisher figshare collection journal article supplement (https://acs.figshare.com/ndownloader/files/4114354)
Supplement: Supplementary file 1 [file 4114354]

# A Wide-Range Photoacoustic Aerosol Absorption Spectrometer

*C. Haisch\*, P. Menzenbach,, H. Bladt, R. Niessner*

Chair for Analytical Chemistry, Technische Universität München, Marchioninistr.17, D-81377

Munich, Germany

## Supporting Information

[Christoph.Haisch@ch.tum.de](mailto:Christoph.Haisch@ch.tum.de)

Tel +49 89 2180 78242

Fax +49 89 2180 99 78242

### Table of Content:

- Figure S-1      Wavelength dependency of the OPO laser system employed for the PA aerosol absorption spectrometer.
- Figure S-2      Typical PA signal of the pulsed PA system.
- Figure S-3      FFT spectrum of a typical PA Signal.
- Figure S-4      Comparison of the infrared absorption of saturated water vapour as measured by the PA system with the corresponding HITRAN data.
- Figure S-5      Calibration of the PA aerosol spectrometer with the wavelength where each data point was determined.
- Figure S-6      Temporal behavior of the optical absorption spectra of propane soot.

Figure S-7 Temporal behavior of the specific optical absorption spectra of propane soot with 50% (m/m) iron content.

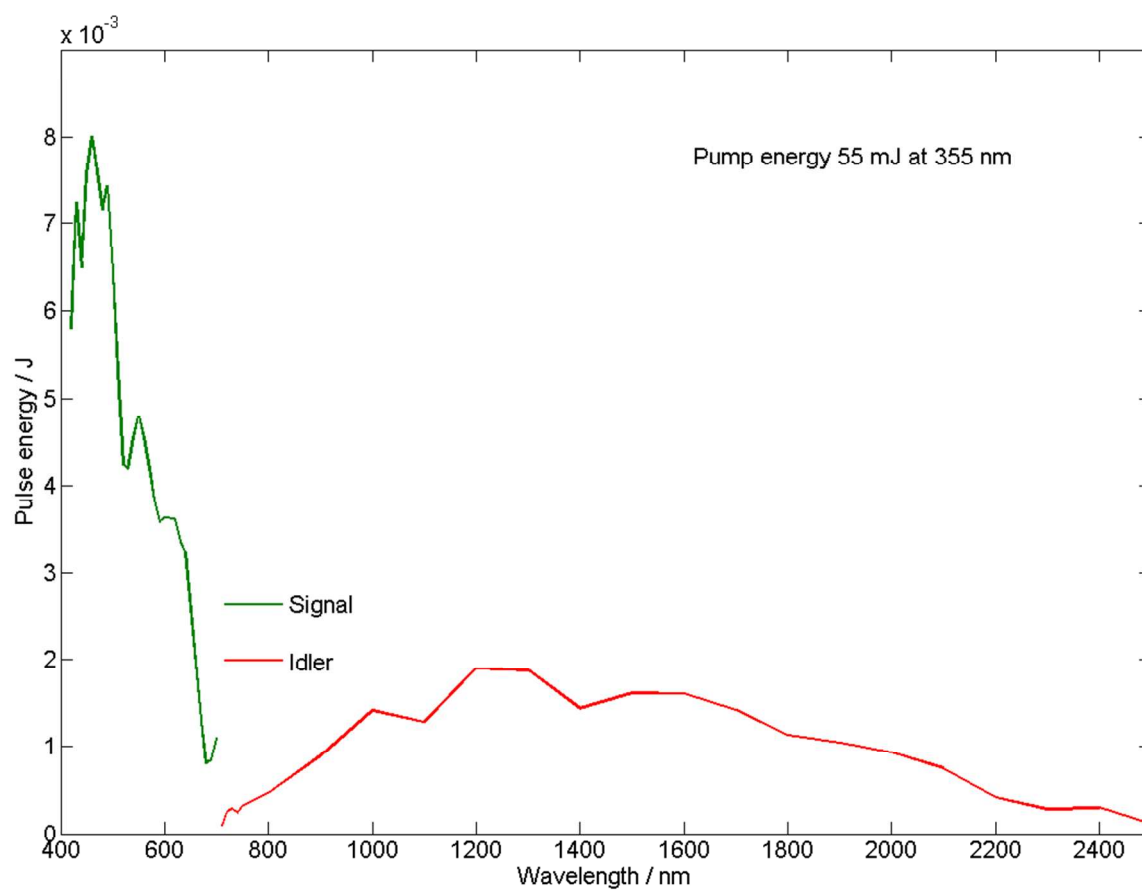

Figure S-1 Wavelength dependency of the OPO laser system.

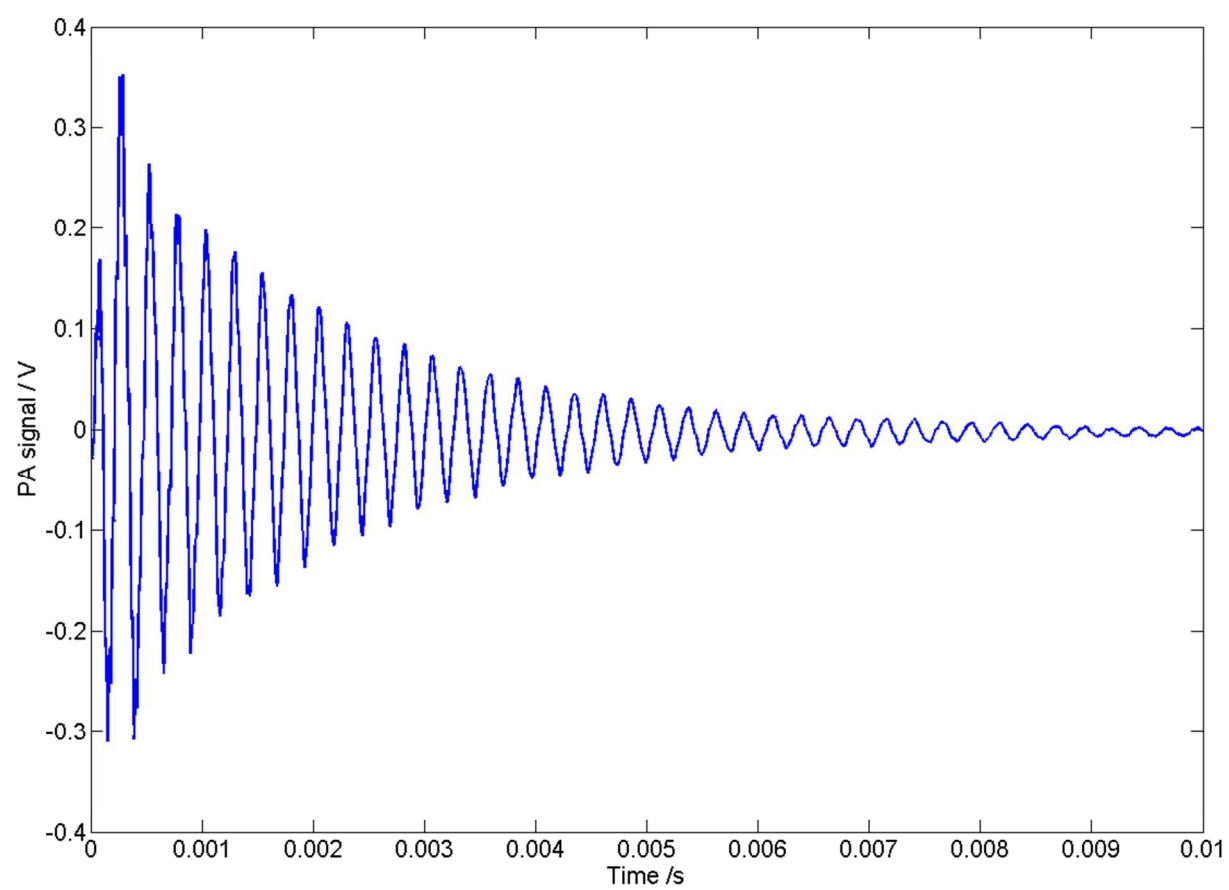

Figure S-2 Typical PA signal of the pulsed PA system.

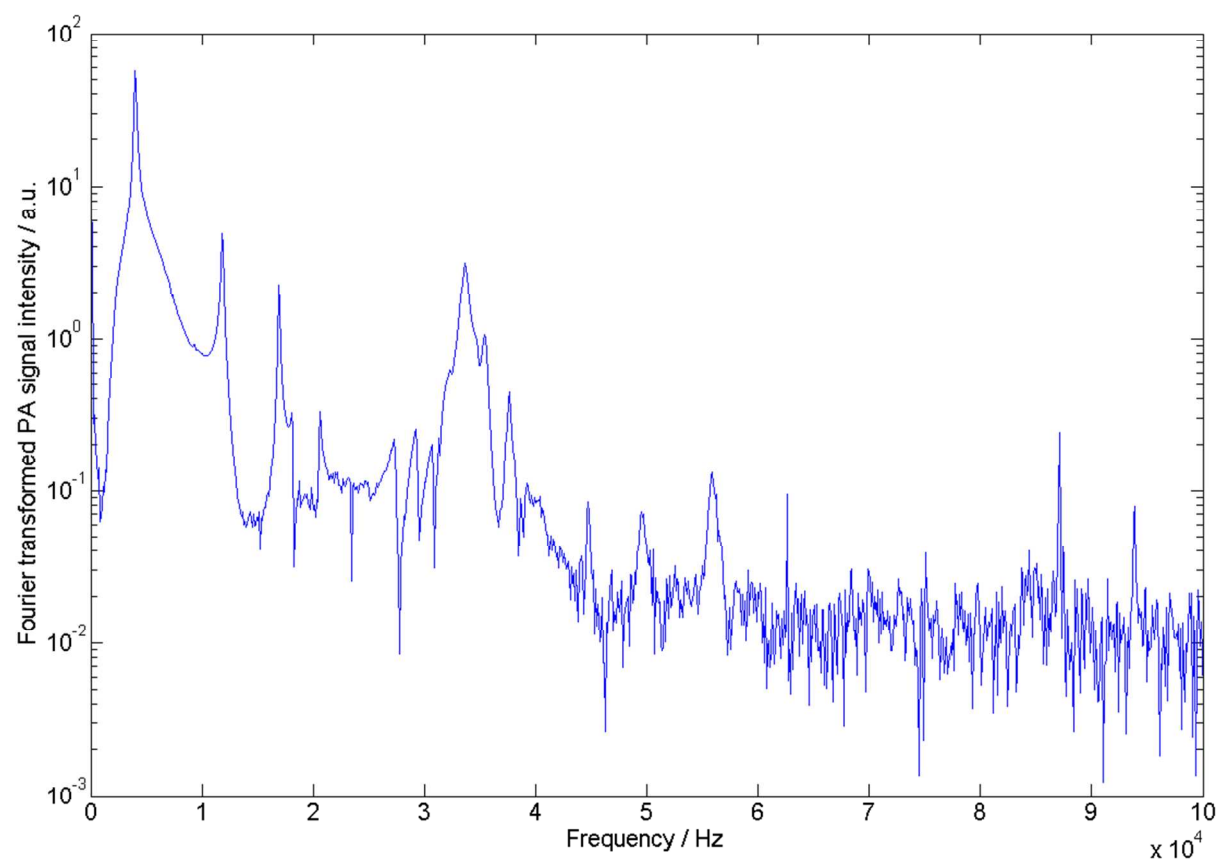

Figure S-3 FFT spectrum of a typical PA signal as employed for data evaluation.

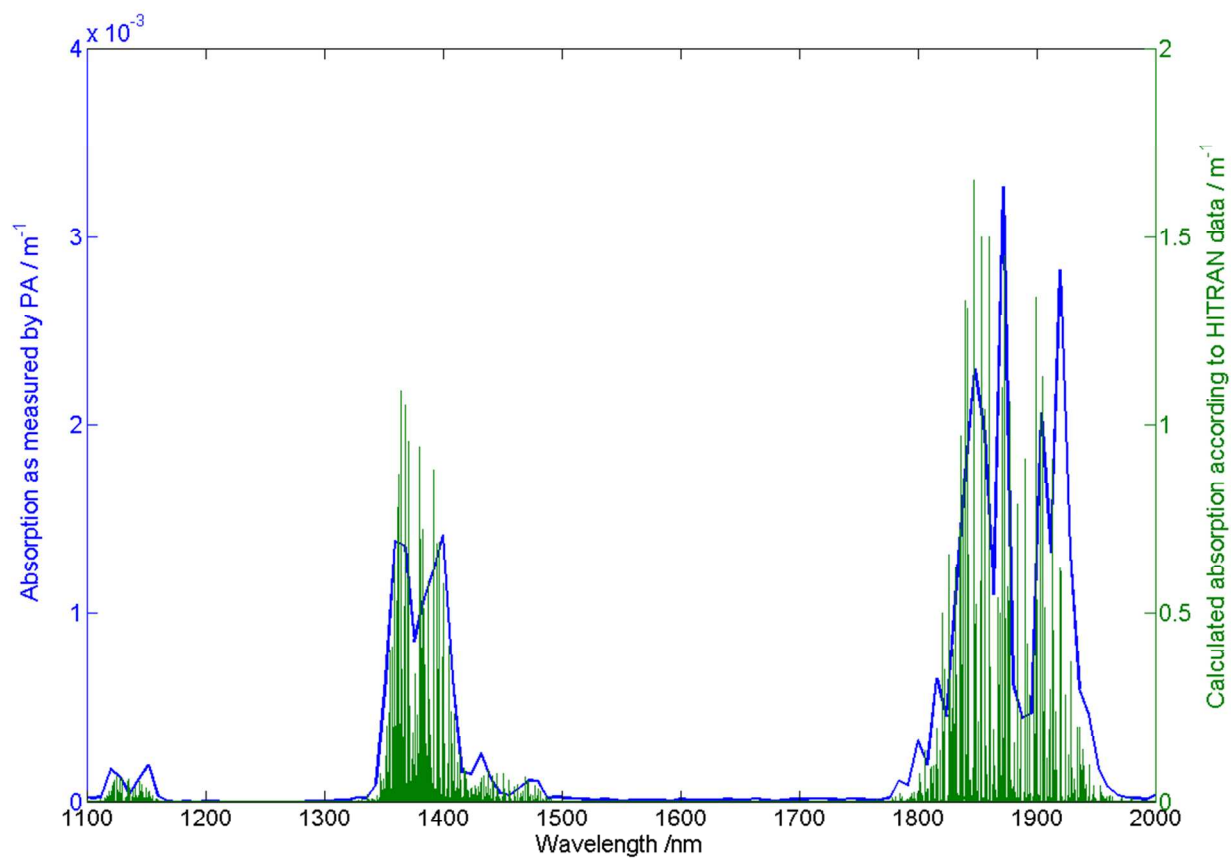

Figure S-4 Comparison of the infrared absorption of saturated water vapour ( $T = 23\text{ }^{\circ}\text{C}$ ,  $p = 1013\text{ hPa}$ ) as measured by the PA system with the corresponding HITRAN data.

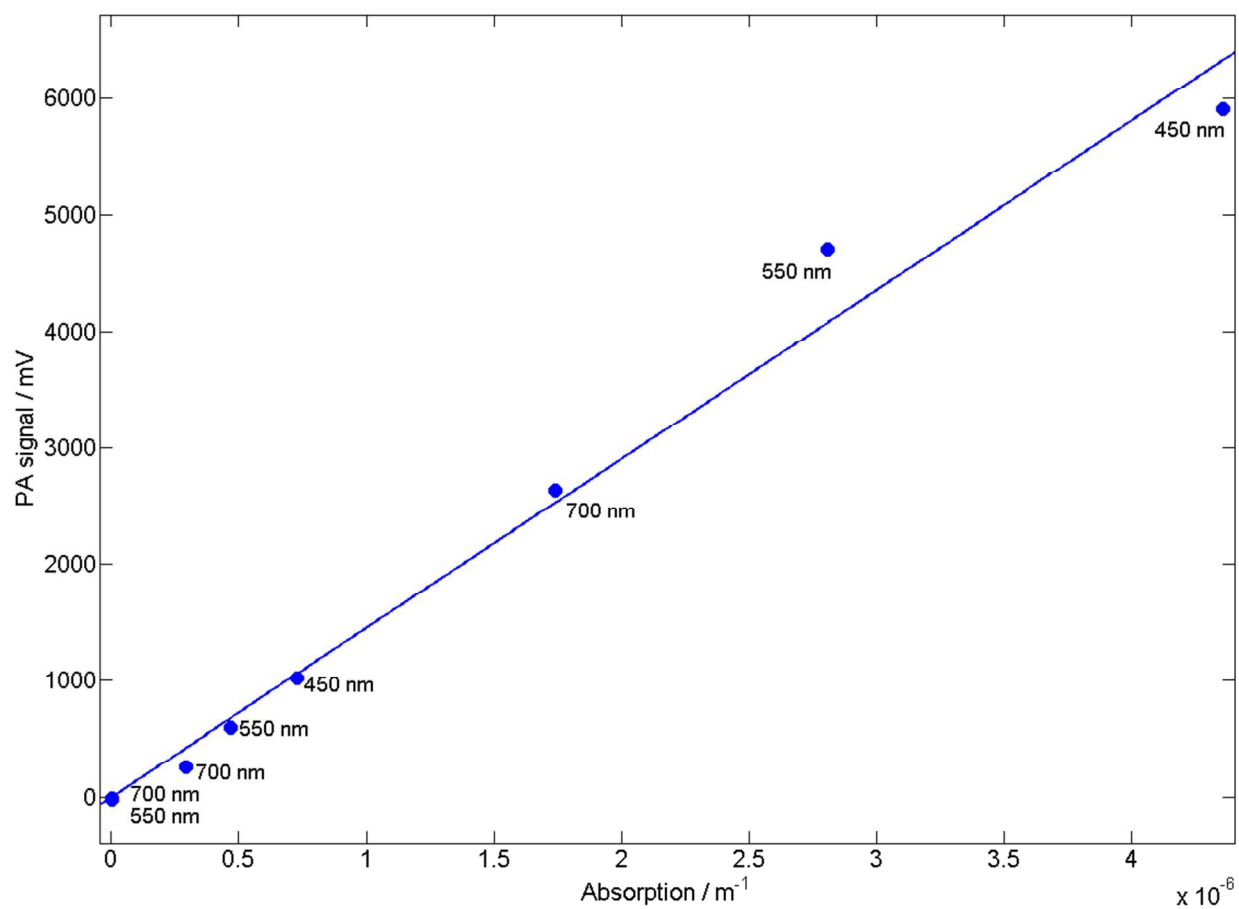

Figure S-5 Calibration of the PA aerosol spectrometer with the wavelength where each data point was determined. Each data point represents a mean value of 3 individual measurements.

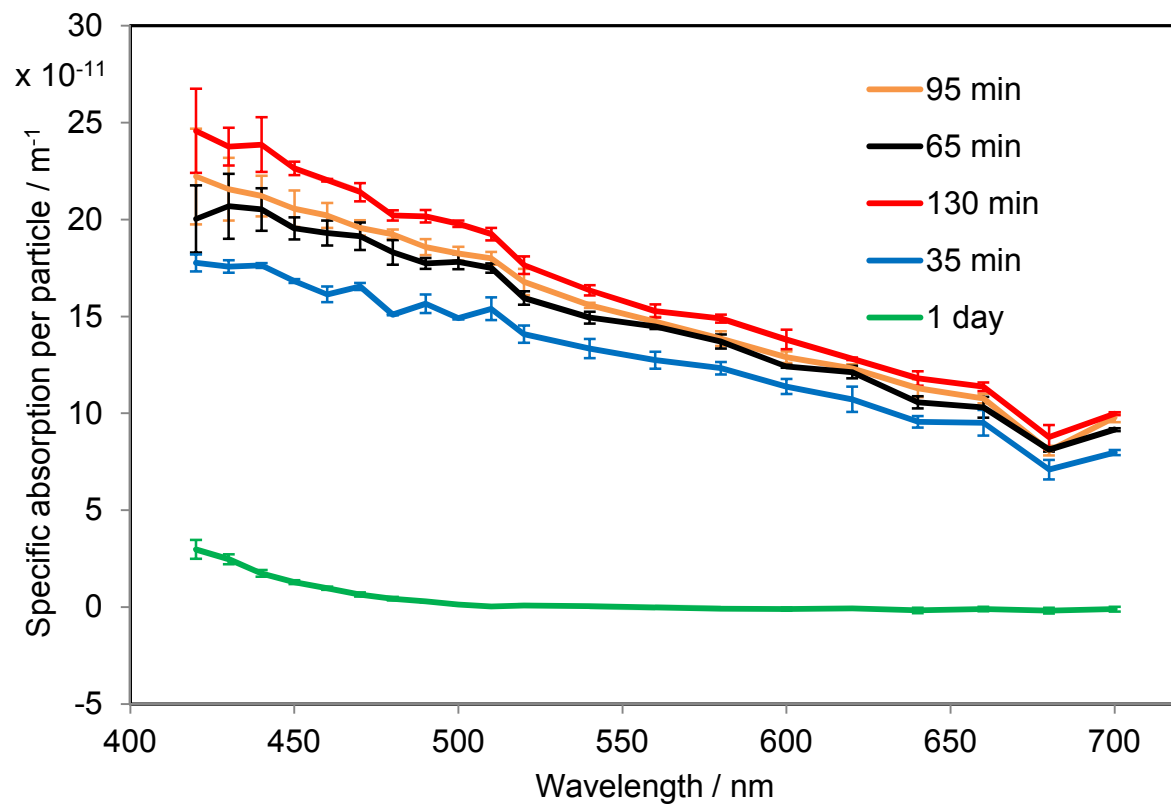

Figure S-6 Temporal behavior of the optical absorption spectra of propane soot.

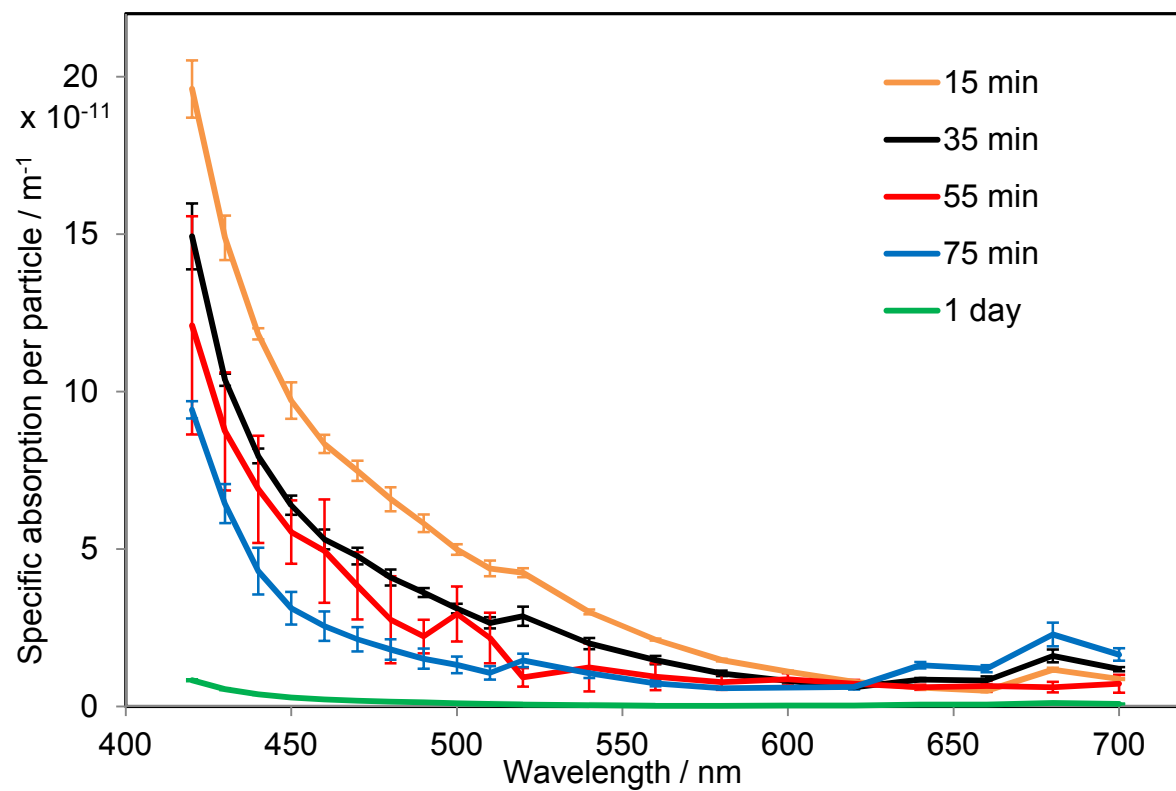

Figure S-7 Temporal behavior of the specific optical absorption spectra of propane soot with 50% (m/m) iron content.
